# Supplementary material for: Gender gap in journal submissions and peer review during the first wave of the COVID-19 pandemic. A study on 2329 Elsevier journals
Source: PubMed Central journal article supplement (PMC8528305; doi:10.1371/journal.pone.0257919), 2021-10-20
Supplement: pone.0257919.s002.pdf [file pone.0257919.s002.pdf]

|                            | Feb-May 2018 | Feb-May 2019 | Feb-May 2020 |
|----------------------------|--------------|--------------|--------------|
| HMS submissions            | 131834       | 147401       | 240587       |
| LS submissions             | 90488        | 101765       | 125380       |
| PS submissions             | 288234       | 322039       | 378659       |
| SSE submissions            | 45109        | 49480        | 62823        |
| Total submissions          | 555665       | 620685       | 807449       |
| HMS review invitations     | 371038       | 415033       | 554895       |
| LS review invitations      | 287028       | 336203       | 430908       |
| PS review invitations      | 770137       | 986905       | 1255735      |
| SSE review invitations     | 77663        | 109115       | 139746       |
| Total review invitations   | 1505866      | 1847256      | 2381284      |
| HMS accepted invitations   | 130723       | 161447       | 217064       |
| LS accepted invitations    | 91643        | 120589       | 146120       |
| PS accepted invitations    | 264307       | 386956       | 500644       |
| SSE accepted invitations   | 33456        | 51812        | 67994        |
| Total accepted invitations | 520129       | 720804       | 931822       |

Table S1: Total number of new submissions, review invitations, and accepted invitations per area of research in February-May 2020 and corresponding months of 2018 and 2019. Note that data reported here differ from those in Table 1 because: (i) several authors could have submitted the same manuscript to different journals, which was only counted once here; and (ii) submissions and reviews from academics whose gender was not guessed by our algorithm were included here but not in Table 1.
