# Supplementary material for: Gender gap in journal submissions and peer review during the first wave of the COVID-19 pandemic. A study on 2329 Elsevier journals
Source: PubMed Central journal article supplement (PMC8528305; doi:10.1371/journal.pone.0257919), 2021-10-20
Supplement: pone.0257919.s003.pdf [file pone.0257919.s003.pdf]

| IF quartile | Health & Medicine | Life Sciences | Physical Sciences & Engineering | Social Sciences & Economics |
|-------------|-------------------|---------------|---------------------------------|-----------------------------|
| Q1          | 15.20             | 27.30         | 38.60                           | 35.20                       |
| Q2          | 15.80             | 26.40         | 29.60                           | 25.00                       |
| Q3          | 15.10             | 14.90         | 11.40                           | 14.80                       |
| Q4          | 5.60              | 2.60          | 2.30                            | 1.90                        |
| No IF       | 48.30             | 28.80         | 18.10                           | 23.10                       |

Table S2: Proportion (%) of journals included in each quartile of the impact factor distribution by area of research. The quartiles were calculated using The 2020 Journal Citation Reports by Clarivate Analytics
