# Supplementary material for: Gender gap in journal submissions and peer review during the first wave of the COVID-19 pandemic. A study on 2329 Elsevier journals
Source: PubMed Central journal article supplement (PMC8528305; doi:10.1371/journal.pone.0257919), 2021-10-20
Supplement: pone.0257919.s004.pdf [file pone.0257919.s004.pdf]

|                | Health &<br>Medicine           | Life<br>Sciences               | Physical Sciences<br>& Engineering | Social Sciences<br>& Economics |
|----------------|--------------------------------|--------------------------------|------------------------------------|--------------------------------|
| Women          | -0.133<br>(0.027)<br>p < 0.001 | -0.054<br>(0.037)<br>p = 0.141 | -0.105<br>(0.066)<br>p = 0.114     | -0.063<br>(0.044)<br>p = 0.149 |
| Age            | 0.003<br>(0.001)<br>p = 0.001  | -0.001<br>(0.001)<br>p = 0.241 | -0.008<br>(0.002)<br>p < 0.001     | -0.003<br>(0.001)<br>p = 0.064 |
| Women × Age    | -0.001<br>(0.002)<br>p = 0.392 | -0.005<br>(0.002)<br>p = 0.029 | -0.005<br>(0.004)<br>p = 0.216     | -0.004<br>(0.003)<br>p = 0.212 |
| Intercept      | 1.421<br>(0.037)<br>p < 0.001  | 1.025<br>(0.044)<br>p < 0.001  | 1.338<br>(0.059)<br>p < 0.001      | 1.263<br>(0.033)<br>p < 0.001  |
| Observations   | 51916                          | 11557                          | 5401                               | 3039                           |
| Log Likelihood | -99295                         | -17136                         | -8891                              | -3102                          |

Table S3: Mixed effects models predicting February-May 2020 changes in the number of submissions of Covid-related manuscripts per area of research. Random intercepts included for countries.
