# Supplementary material for: Gender gap in journal submissions and peer review during the first wave of the COVID-19 pandemic. A study on 2329 Elsevier journals
Source: PubMed Central journal article supplement (PMC8528305; doi:10.1371/journal.pone.0257919), 2021-10-20
Supplement: pone.0257919.s005.pdf [file pone.0257919.s005.pdf]

|                | Health &<br>Medicine            | Life<br>Sciences                | Physical Sciences<br>& Engineering | Social Sciences<br>& Economics  |
|----------------|---------------------------------|---------------------------------|------------------------------------|---------------------------------|
| Women          | -0.109<br>(0.006)<br>p < 0.001  | -0.066<br>(0.007)<br>p < 0.001  | -0.086<br>(0.008)<br>p < 0.001     | -0.068<br>(0.011)<br>p < 0.001  |
| Age            | -0.002<br>(0.0002)<br>p < 0.001 | -0.001<br>(0.0002)<br>p < 0.001 | -0.003<br>(0.0002)<br>p < 0.001    | -0.004<br>(0.0004)<br>p < 0.001 |
| Women×Age      | 0.001<br>(0.0004)<br>p = 0.005  | 0.002<br>(0.0004)<br>p < 0.001  | 0.002<br>(0.001)<br>p < 0.001      | 0.002<br>(0.001)<br>p = 0.005   |
| Intercept      | 0.199<br>(0.014)<br>p < 0.001   | 0.106<br>(0.014)<br>p < 0.001   | 0.188<br>(0.016)<br>p < 0.001      | 0.161<br>(0.013)<br>p < 0.001   |
| Observations   | 572621                          | 417597                          | 786620                             | 141135                          |
| Log Likelihood | -980931                         | -693475                         | -1640532                           | -223934                         |

Table S4: Mixed effects models predicting February-May 2020 changes in the number of submissions of research papers. The baseline is represented by the average of corresponding months in 2018 and 2019. Random intercepts included for countries.
