# Supplementary material for: Gender gap in journal submissions and peer review during the first wave of the COVID-19 pandemic. A study on 2329 Elsevier journals
Source: PubMed Central journal article supplement (PMC8528305; doi:10.1371/journal.pone.0257919), 2021-10-20
Supplement: pone.0257919.s006.pdf [file pone.0257919.s006.pdf]

|                | Health & Medicine               | Life Sciences                   | Physical Sciences & Engineering | Social Sciences & Economics     |
|----------------|---------------------------------|---------------------------------|---------------------------------|---------------------------------|
| Women          | -0.105<br>(0.007)<br>p < 0.001  | -0.063<br>(0.009)<br>p < 0.001  | -0.075<br>(0.009)<br>p < 0.001  | -0.065<br>(0.012)<br>p < 0.001  |
| Age            | -0.003<br>(0.0002)<br>p < 0.001 | -0.001<br>(0.0003)<br>p = 0.075 | -0.002<br>(0.0003)<br>p < 0.001 | -0.003<br>(0.0004)<br>p < 0.001 |
| Women×Age      | 0.001<br>(0.0004)<br>p = 0.017  | 0.001<br>(0.001)<br>p = 0.005   | 0.002<br>(0.001)<br>p = 0.002   | 0.002<br>(0.001)<br>p = 0.036   |
| Intercept      | 0.229<br>(0.014)<br>p < 0.001   | 0.136<br>(0.015)<br>p < 0.001   | 0.182<br>(0.016)<br>p < 0.001   | 0.163<br>(0.014)<br>p < 0.001   |
| Observations   | 345053                          | 232588                          | 659082                          | 109992                          |
| Log Likelihood | -548169                         | -373027                         | -1339275                        | -164240                         |

Table S5: Mixed effects models predicting February-May 2020 changes in the number of submissions of manuscripts submitted to Q1 journals. The baseline is represented by the average of corresponding months in 2018 and 2019. Random intercepts included for countries.
