# Supplementary material for: Gender gap in journal submissions and peer review during the first wave of the COVID-19 pandemic. A study on 2329 Elsevier journals
Source: PubMed Central journal article supplement (PMC8528305; doi:10.1371/journal.pone.0257919), 2021-10-20
Supplement: pone.0257919.s007.pdf [file pone.0257919.s007.pdf]

|                | Health &<br>Medicine            | Life<br>Sciences                | Physical Sciences<br>& Engineering | Social Sciences<br>& Economics |
|----------------|---------------------------------|---------------------------------|------------------------------------|--------------------------------|
| Women          | -0.117<br>(0.010)<br>p < 0.001  | -0.038<br>(0.010)<br>p < 0.001  | -0.035<br>(0.010)<br>p = 0.001     | -0.043<br>(0.016)<br>p = 0.007 |
| Age            | -0.002<br>(0.0004)<br>p < 0.001 | -0.002<br>(0.0004)<br>p < 0.001 | -0.006<br>(0.0004)<br>p < 0.001    | -0.003<br>(0.001)<br>p < 0.001 |
| Women×Age      | -0.0004<br>(0.001)<br>p = 0.604 | -0.0005<br>(0.001)<br>p = 0.535 | -0.001<br>(0.001)<br>p = 0.247     | 0.0003<br>(0.001)<br>p = 0.782 |
| Intercept      | 0.273<br>(0.017)<br>p < 0.001   | 0.112<br>(0.014)<br>p < 0.001   | 0.140<br>(0.013)<br>p < 0.001      | 0.148<br>(0.015)<br>p < 0.001  |
| Observations   | 185966                          | 114009                          | 291372                             | 54379                          |
| Log Likelihood | -301882                         | -169740                         | -532651                            | -80448                         |

Table S6: Mixed effects models predicting February-May 2020 changes in the number of submissions by first authors. The baseline is represented by the average of corresponding months in 2018 and 2019. Random intercepts included for countries.
