# Supplementary material for: Gender gap in journal submissions and peer review during the first wave of the COVID-19 pandemic. A study on 2329 Elsevier journals
Source: PubMed Central journal article supplement (PMC8528305; doi:10.1371/journal.pone.0257919), 2021-10-20
Supplement: pone.0257919.s008.pdf [file pone.0257919.s008.pdf]

|                | Health &<br>Medicine           | Life<br>Sciences               | Physical Sciences<br>& Engineering | Social Sciences<br>& Economics |
|----------------|--------------------------------|--------------------------------|------------------------------------|--------------------------------|
| Women          | -0.257<br>(0.040)<br>p < 0.001 | -0.113<br>(0.051)<br>p = 0.029 | -0.065<br>(0.045)<br>p = 0.148     | -0.123<br>(0.036)<br>p = 0.001 |
| Age            | -0.006<br>(0.001)<br>p < 0.001 | -0.005<br>(0.001)<br>p < 0.001 | -0.006<br>(0.001)<br>p < 0.001     | -0.002<br>(0.001)<br>p = 0.085 |
| Women×Age      | 0.007<br>(0.002)<br>p = 0.003  | 0.003<br>(0.003)<br>p = 0.315  | -0.001<br>(0.003)<br>p = 0.717     | 0.001<br>(0.003)<br>p = 0.792  |
| Intercept      | 0.463<br>(0.030)<br>p < 0.001  | 0.160<br>(0.032)<br>p < 0.001  | 0.171<br>(0.024)<br>p < 0.001      | 0.118<br>(0.023)<br>p < 0.001  |
| Observations   | 16861                          | 8983                           | 33003                              | 14015                          |
| Log Likelihood | -29182                         | -15152                         | -67330                             | -22001                         |

Table S7: Mixed effects models predicting February-May 2020 changes in the number of submissions by solo authors. The baseline is represented by the average of corresponding months in 2018 and 2019. Random intercepts included for countries.
