# Supplementary material for: Gender gap in journal submissions and peer review during the first wave of the COVID-19 pandemic. A study on 2329 Elsevier journals
Source: PubMed Central journal article supplement (PMC8528305; doi:10.1371/journal.pone.0257919), 2021-10-20
Supplement: pone.0257919.s009.pdf [file pone.0257919.s009.pdf]

|                   | Health &<br>Medicine            | Life<br>Sciences                | Physical Sciences<br>& Engineering | Social Sciences<br>& Economics |
|-------------------|---------------------------------|---------------------------------|------------------------------------|--------------------------------|
| Women             | -0.007<br>(0.014)<br>p = 0.613  | 0.017<br>(0.016)<br>p = 0.280   | 0.002<br>(0.011)<br>p = 0.860      | -0.064<br>(0.025)<br>p = 0.012 |
| Age               | 0.002<br>(0.0002)<br>p < 0.001  | 0.002<br>(0.0002)<br>p < 0.001  | 0.001<br>(0.0001)<br>p < 0.001     | 0.001<br>(0.0003)<br>p = 0.004 |
| Residential       | 0.002<br>(0.001)<br>p = 0.005   | 0.001<br>(0.001)<br>p = 0.264   | 0.001<br>(0.0005)<br>p = 0.065     | -0.001<br>(0.001)<br>p = 0.197 |
| Women×Age         | 0.0003<br>(0.0003)<br>p = 0.336 | 0.0001<br>(0.0003)<br>p = 0.765 | -0.00004<br>(0.0003)<br>p = 0.895  | 0.001<br>(0.001)<br>p = 0.351  |
| Women×Residential | -0.001<br>(0.001)<br>p = 0.569  | -0.001<br>(0.001)<br>p = 0.223  | -0.001<br>(0.001)<br>p = 0.438     | 0.003<br>(0.002)<br>p = 0.057  |
| Intercept         | -0.093<br>(0.010)<br>p < 0.001  | -0.096<br>(0.012)<br>p < 0.001  | -0.063<br>(0.007)<br>p < 0.001     | -0.025<br>(0.014)<br>p = 0.065 |
| Observations      | 86802                           | 71101                           | 163760                             | 27005                          |
| Log Likelihood    | -53020                          | -44604                          | -97616                             | -18430                         |

Table S8: Mixed effects models predicting February-May 2020 changes in the proportion of accepted review invitations per area of research. The baseline is represented by the average of the corresponding months in 2019. Models included time in residential areas from Google’s COVID-19 Community Mobility Report (see: <https://www.google.com/covid19/mobility/>; accessed on 30 June 2020). Random intercepts included for countries.
